# Long-read whole genome analysis of human single cells

Joanna Hård<sup>1,\*</sup>, Jeff E Mold<sup>1</sup>, Jesper Eisfeldt<sup>2,3</sup>, Christian Tellgren-Roth<sup>4</sup>, Susana Häggqvist<sup>4</sup>, Ignas Bunikis<sup>4</sup>, Orlando Contreras-Lopez<sup>5</sup>, Chen-Shan Chin<sup>6</sup>, Jessica Nordlund<sup>7</sup>, Carl-Johan Rubin<sup>8</sup>, Lars Feuk<sup>4</sup>, Jakob Michaëlsson<sup>9</sup>, Adam Ameer<sup>4,\*</sup>

<sup>1</sup> Department of Cell and Molecular Biology, Karolinska Institutet, Stockholm, Sweden

<sup>2</sup> Department of Molecular Medicine and Surgery, Karolinska Institutet

<sup>3</sup> Department of Clinical Genetics, Karolinska University Hospital, Stockholm, Sweden

<sup>4</sup> Science for Life Laboratory, Department of Immunology, Genetics and Pathology, Uppsala University, Uppsala, Sweden

<sup>5</sup> Science for Life Laboratory, Royal Institute of Technology (KTH), Stockholm, Sweden

<sup>6</sup> Sema4, OpCo, Inc, Stamford, USA

<sup>7</sup> Science for Life Laboratory, Department of Medical Sciences, Uppsala University, Uppsala, Sweden

<sup>8</sup> Department of Medical Biochemistry and Microbiology, Uppsala University, Uppsala, Sweden.

<sup>9</sup> Center for Infectious Medicine, Department of Medicine, Karolinska Institutet, Stockholm, Sweden

\* Corresponding authors

## Abstract

With long-read sequencing, we have entered an era where individual genomes are routinely assembled to near completion and where complex genetic variation can efficiently be resolved. Here, we demonstrate that long reads can be applied to study the genomic architecture of individual human cells. Clonally expanded CD8<sup>+</sup> T-cells from a human donor were used as starting material for a droplet-based multiple displacement amplification (dMDA) to generate long molecules with minimal amplification bias. PacBio HiFi sequencing generated up to 20 Gb data and 40% genome coverage per single cell. The data allowed for accurate detection and haplotype phasing of single nucleotide variants (SNVs), structural variants (SVs), and tandem repeats, including in genomic regions inaccessible by short reads. Somatic SNVs were detected in the nuclear genome and mitochondrial DNA. An average of 1278 high-confidence SVs per cell were discovered in the PacBio data, nearly four times as many compared to those found in Illumina dMDA data from clonally related cells. Single-cell *de novo* assembly resulted in a genome size of up to 598 Mb and 1762 (12.8%) complete gene models. In summary, the work presented here demonstrates the utility of whole genome amplification combined with long-read sequencing toward the characterization of the full spectrum of genetic variation at the single-cell level.

## Keywords

Single-cell sequencing, long-read sequencing, structural variation, tandem repeats, somatic variation, *de novo* assembly, droplet amplification, dMDA, HiFi sequencing

## Background

During the last few years, long-read sequencing technologies have made remarkable progress in terms of throughput and data quality. Due to their capability to read through repetitive and high GC-content regions, these technologies are essential for the ambitious plans to generate reference genomes for virtually all of Earth's eukaryotic biodiversity<sup>1, 2</sup>, as well as complete telomere-to-telomere maps of the human genome<sup>3</sup>. A further advantage of long-read sequencing is that it facilitates genotyping of complex structural variation (SVs) and repeat elements, which can be difficult or impossible to identify with other genomic sequencing approaches<sup>4-6</sup>. Although clinical long-read sequencing is still in its infancy<sup>7, 8</sup>, several studies have already demonstrated the potential to discover novel disease-causing human genetic variation<sup>9</sup>. Long sequencing reads also enables the detection of clinically relevant genetic variation in 'dark DNA', representing regions of the human genome that cannot be analyzed with standard short-read technologies<sup>10</sup>.

Long-read sequencing holds many promises, but one research area that remains unexplored is single-cell genomics. Human single-cell whole genome sequencing (WGS) emerged about a decade ago<sup>11-15</sup>, and has become an active field of research with the potential to answer fundamental questions in several areas of cell biology, such as somatic genetic variation<sup>16</sup>, tumor evolution<sup>11</sup>, de novo mutation rates<sup>14</sup>, meiotic recombination of germ cells<sup>14, 17</sup>, or neurogenetics<sup>18-20</sup>. Until now, single-cell WGS projects have focused on characterizing genetic variation detectable from short-read Illumina sequencing protocols<sup>21-25</sup>, including single nucleotide variants (SNVs)<sup>19, 21, 26-31</sup>, SVs<sup>32</sup>, large-scale copy number variation<sup>30, 33-35</sup> and retrotransposon elements<sup>12, 18, 36, 37</sup>. While multiple methods exist for single-cell short-read WGS, there are no available technologies to support the identification of the full extent of genetic variation in individual cells. One recent report demonstrates the utility of long-read

sequencing for analysis of SVs, but with limited performance in the detection of other types of genetic variation<sup>38</sup>.

The lack of methods for single-cell WGS with long-read technologies can in part be explained by the throughput of long-read sequencing instruments, which until recently has been relatively modest. Moreover, single-cell genome sequencing is challenging<sup>39</sup> since a diploid cell contains only two DNA molecules at each locus in the genome, and every molecule that is lost during sample preparation, or fails to be sequenced, inevitably leads to allelic drop-out and missing data. Moreover, the long-read sequencing protocols require large amounts, typically several micrograms, of input DNA. This is about a million times more DNA than what is contained within a single human cell, which implies that substantial DNA amplification is required.

Whole genome amplification has a profound detrimental effect on the sequencing results and should be avoided when possible. This is because whole genome amplification introduces amplification bias, chimeric molecules, and allelic dropout. Several different amplification protocols have been developed<sup>15, 40, 41</sup> and it is crucial to choose a method that minimizes artifacts and biases, while at the same time being compatible with the downstream sequencing technology. Multiple displacement amplification (MDA)<sup>41</sup> has the capacity to amplify kilobase-length molecules and could therefore be a suitable approach for long-read sequencing. With regards to amplification bias, it has been proposed that a droplet-based MDA (dMDA) reaction, performed on DNA fragments contained within nano- or picoliter droplets, can minimize differences in amplification gain among the fragments<sup>42-44</sup>. Such a droplet-based amplification could also be an efficient approach to remove inter-molecular chimeras since MDA chimeras only can be formed between molecules contained within the same droplet.

Single-cell DNA fragments amplified by MDA are well-suited for PacBio high-fidelity (HiFi) sequencing<sup>45</sup>, a protocol that works best for molecules of up to 20kb in length. HiFi reads have

high accuracy (>QV20) and allow not only for the identification of complex genetic variation such as SVs and repeat elements, but also SNVs at a level that matches the ability of short-read sequencing<sup>45</sup>. PacBio HiFi sequencing has also proven to be an excellent method for high-quality genome assembly<sup>46-49</sup>, thereby raising the prospect of long-read *de novo* assembly of genomic DNA from individual cells. The potential applications are not limited to human cells. Long-read WGS could also potentially generate improved genome information for other sample sources, such as single-cellular organisms that are difficult to culture.

In this study, we present a new method for long-read whole genome analysis of human single cells. The workflow utilizes an automated dMDA technique for single-cell whole genome amplification coupled with PacBio HiFi whole genome sequencing. The method was evaluated on clonally expanded CD8<sup>+</sup> T-cells from a human donor. For comparison, other cells from the same T-cell clones were sequenced with short-read Illumina WGS. Our results show that long-read sequencing gives improved performance for the detection of genetic variation in single cells, in particular for haplotype phasing, complex structural variation, and tandem repeats. Moreover, we show that it is possible to reconstruct parts of a human T-cell genome *de novo*.

## Results

### *A single-cell WGS workflow compatible with short- and long-read sequencing*

We first aimed to develop a DNA amplification method that preserves molecule lengths and reduces amplification bias (Figure 1A). Briefly, one single cell is isolated by fluorescence-activated cell sorting (FACS) and placed into a well containing lysis buffer, so that the DNA fragments are released. The DNA molecules are then encapsulated in approximately 50,000 droplets, after which a dMDA reaction takes place within each droplet. The droplets have a diameter of <100  $\mu\text{m}$  and are generated using the Xdrop system<sup>50</sup> (Figure 1B). Only one or a few DNA fragments will be located in each droplet, and since the amplification takes place in a small volume containing limited reagents this prevents molecules from being heavily over-amplified. Moreover, the risk of forming inter-molecular chimeras during the dMDA reaction is greatly reduced by our method. In droplets harboring a single DNA fragment, the risk is completely eliminated. Once the dMDA reaction is complete, the amplified DNA can be used for the preparation of short- or long-read sequencing libraries. For our experiments, two individual CD8<sup>+</sup> T-cells (A and B) from the same human donor were clonally expanded *in vitro*, and the resulting cell collections were used as starting material for whole genome amplification and sequencing (Figure 1C). In addition, bulk DNA isolated from peripheral blood mononuclear cells (PBMC) obtained from the same individual was analyzed, at over 30x WGS coverage both with short Illumina reads and long PacBio HiFi reads.

### *dMDA increases coverage uniformity*

Sixteen single-cell DNA samples from the two T-cell clones A and B were analyzed using Illumina WGS. Eight of the samples were amplified using dMDA, while the remaining eight samples were subjected to standard MDA (MDA). The sequencing resulted in 100 to 200 million read pairs per sample (supplementary Table S1), and these were aligned to the GRCh38

human reference build. To facilitate direct comparisons between the samples, all Illumina datasets were randomly subsampled to contain about 100 million read pairs (supplementary Table S2). As expected, the eight dMDA samples displayed a more uniform coverage across the genome as compared to the eight MDA samples (Figure 2A-C). Furthermore, our results revealed that the uneven coverage in the MDA samples originated from a limited number of fragments that were amplified to extreme coverage (Figure 2D). For the MDA samples, on average 68.9% of the reads aligned to regions with  $\geq 200\times$  coverage, while the corresponding percentage for dMDA was only 16.0%. In these downsampled datasets, 33.8% of bases were covered by at least one read in dMDA as compared to 23.4% for MDA (Figure 2E). Based on these results, we conclude that dMDA gives increased sequencing coverage uniformity as compared to regular MDA, thereby corroborating previous evaluations of droplet-based MDA methods<sup>42, 43</sup>.

### ***Long-read whole-genome sequencing of individual T-cells***

We used five dMDA single-cell samples, two from T-cell clone A and three from T-cell clone B, for PacBio long-read sequencing (supplementary Table S3). The dMDA reactions generated 1-4  $\mu\text{g}$  of amplified DNA and the fragment size distributions displayed peaks around 9 kb (supplementary Figure S1). We subsequently prepared libraries from the amplified DNA using SMRT bell size selection (see Methods) and sequenced each library on an individual 8M SMRT cell, generating up to 2.75 million reads and 20 Gb HiFi data ( $>QV20$ ) for a single cell (supplementary Table S4). About 99% of reads could be aligned to GRCh38 and the average alignment concordance was 98.91% or higher. On average, 2.7 separate alignments were produced for each HiFi read, indicating the presence of chimeric artifacts from the dMDA. These chimeric reads are mainly intramolecular, i.e., formed within encapsulated DNA molecules during the dMDA reaction, and they can be split into non-chimeric parts using

bioinformatics tools. The aligned read length is a good indicator of the non-chimeric part of a read since it corresponds to the longest subsequence that can be continuously matched to the GRCh38 reference. The N50 aligned read length was 2.8 - 3.6 kb for the single cells, and the maximum read alignment was over 50 kb.

### ***Mitochondrial heteroplasmy in T-cell clone B***

mtDNA represents a substantial source of somatic genetic variation<sup>51</sup>. However, amplification bias may result in limited read coverage over mtDNA and prevention to detect mitochondrial variation. Based on our single-cell Illumina data we found that dMDA outperforms MDA in terms of mtDNA coverage (Supplementary Figure S2). In the long-read data, we found that 17% of the mtDNA reads covered at least 25% of the complete mitochondrial genome, thereby opening up the possibility to phase large parts of the individual mtDNA molecules present in a single cell. In our population, we observed one location (chrM:16,218) where a C>T nucleotide substitution occurred in 41% - 67% for the three single cells from T-cell clone B, while being completely absent from the reads for T-cell clone A, as well as from the bulk DNA sample (supplementary Figure S3). By further analyzing the Illumina data for the two single-cell clones, we validated that the nucleotide substitution was present in T-cell clone B, but not in T-cell clone A, consistent with mitochondrial heteroplasmy in T-cell clone B (supplementary Figure S4).

### ***Detection of SNVs in single-cell long-read data***

Between 1.3 and 1.9 million SNVs were detected in the single-cell PacBio data by the software DeepVariant<sup>52</sup> (supplementary Table S5). On average, 0.95 million SNVs per single cell were found to be overlapping with SNVs called from the bulk PacBio HiFi data. Since DeepVariant has been shown to achieve genome-wide SNV precision and recall rates of at least 99.91% on



PacBio HiFi data<sup>45</sup>, we have high confidence in these overlapping SNVs to be true (Figure 3A). For comparison, a similar analysis using Illumina single-cell dMDA and bulk data resulted in an average of 1.06 million high-confidence SNVs per cell. This implies that a similar number of germline SNVs were detected using PacBio as compared to Illumina, despite that PacBio single-cell sequencing only generated 32% of the Illumina data amount on average (Figure 3B). An average of 125k high-confidence PacBio SNVs/cell escaped detection in the Illumina bulk sample. Of these variants, 5,942 were located in previously reported “dark” genic regions of relevance for human health<sup>10</sup>. One such region comprises introns and exons of *NBPF8* (Figure 3C). Another example is *CDC73*, where a repeat resolved in the PacBio single-cell data was represented as an alignment gap in the Illumina bulk data (Figure 3D). In addition to germline SNVs, 27 somatic SNVs were identified in the PacBio data (supplementary Tables S6-S7). The somatic SNVs were present in at least two single cells from one of the clones, while being absent from the other clone and from the bulk sample (see Methods). Two examples of somatic SNVs are shown in Figures 3E and 3F. It is important to note that PacBio HiFi data provides phasing information over several kilobases. This makes it possible to assign variants detected in the single cells to one of the haplotypes, which highlights one of the advantages of long-read sequencing for the identification and analysis of somatic variation at the single cell level<sup>26, 27</sup>.

### ***Long-read single-cell WGS improves the detection of structural variants***

Structural variants (SVs) were called from the single-cell PacBio data using Sniffles<sup>53</sup>. This resulted in 1278 high-confidence SVs calls per single cell (Figure 4A and supplementary Table S8). For SVs, high confidence variants were defined as having at least 95% reciprocal overlap with SVs called from the PacBio bulk sample. Of these, 57% were insertions, 40% were deletions, and less than 1% represented inversions and duplications. For comparison, a similar analysis of the Illumina dMDA data through SV calling by Manta<sup>54</sup> and TIDDIT<sup>55</sup> resulted in

an average of 327 SVs in every single cell (Supplementary Table S9). Our results thus show that PacBio single-cell WGS improves SV calling as compared to Illumina, on average at a factor of 3.9, despite the lower amount of sequence data. SVs detected in PacBio data consisted mainly of insertions (up to 3 kb length) as well as deletions (up to 10 kb), with clear peaks of insertions and deletions around 300 bp representing ALU repeat elements (Figure 4B). Several of the SVs detected in the single-cell PacBio data are difficult to identify in Illumina bulk data, e.g. an insertion of 710 bp and a deletion of 4,891 bp (Figures 4C-D). The PacBio data not only allows us to determine the exact breakpoints for these SVs in single cells, it also enables the reconstruction of the haplotypes through phasing of nearby heterozygous SNPs. We further searched for somatic SVs in the long-read data but found no events that differed between the T-cell clones.

### *Analysis of tandem repeats in single cells*

We hypothesized that the PacBio HiFi reads would allow us to study tandem repeats (TRs) in single cells. To investigate this, we performed TR calling using Tandem Genotypes<sup>56</sup>. We first extracted all TRs that were called as either homo- or heterozygous in the PacBio bulk data and found 15,098 such repeat elements. In the single cells, an average of 4770 tandem repeat alleles could be correctly genotyped with a repeat size in agreement with the bulk sample (supplementary Table S10). The size distribution of these repeat alleles across all single cells is displayed in Figure 5A. The longest repeat was 662 bp longer than the reference genome and mainly consisted of dinucleotide AT sequences, a region that was difficult to resolve in the short read data (Figure 5B). We found no clear evidence of clonal somatic variation of repeat elements in our single cell long-read data. However, it should be noted that this analysis does not give information about all the repeats in the single cells, in particular those of length >500 bp which were largely missing from our results due to unsuccessful genotyping. A common

reason for failed TR genotyping was the presence of >2 repeat lengths, making it difficult to determine the exact TR sizes.

### ***De novo assembly of single-cell genomes from long-read data***

PacBio HiFi reads are ideal for generating high-quality assemblies of human genomes<sup>45-49</sup>, and we were interested to investigate to what extent regions of the single-cell genomes could be reconstructed de novo. We therefore selected the two single cells with the highest coverage in clone A and B and performed an individual de novo assembly for each of these single cells. Since assembly of single-cell PacBio data is challenging due to allelic dropout and chimeric reads, we developed a filtering method to remove chimeric reads from the dataset prior to assembly. Because of the dMDA, chimeras are mainly formed within the same molecule, and by screening each read for inverted or duplicated elements, chimeric reads could be identified and removed ab initio (see Methods). For T-cells A and B, 44.2% and 46.6% of PacBio reads, respectively, passed our filtering criteria. However, this filtering is stringent and while effectively removing chimeras, it also removes correct reads harboring repeat elements. Hifiasm<sup>57</sup> generated primary assemblies of size 598.3 Mb for T-cell A and 454.1 Mb for T-cell B, corresponding to approximately 19% and 15% of the human reference (supplementary Table S11). The contig N50 values were 35 kb (T-cell A) and 42 kb (T-cell B), and the largest contig of 578.3 kb was detected in the T-cell B assembly. In addition, approximately 40 Mb of alternative contigs were found in each sample. These alternative contigs correspond to regions where hifiasm reported two distinct haplotypes. We further performed an analysis of BUSCO gene models<sup>58</sup> and could conclude that 12.8% of genes (n=1762) were completely assembled for T-cell A, and 9.0% of genes (n=1236) for T-cell B. Complete mitochondrial genomes were obtained and these were identical for T-cells A and B.

## Discussion

By combining methods for automated single-cell processing and droplet-based whole-genome amplification with PacBio HiFi sequencing, we were able to sequence long DNA fragments from single human T-cells. The long sequencing reads resulted in improved analyses of genetic variants as compared to short-read technologies, including in “dark” regions of the human genome, and even enabled *de novo* assembly of parts of the single-cell genomes. The single cells used as the starting point for this study were obtained through *in vitro* expansion of CD8<sup>+</sup> T-cell clones from a healthy human donor. Studying normal somatic cells isolated from a healthy human donor is more challenging as compared to cells from an immortalized cell line, but with the advantage of being more biologically relevant.

Despite that the yield of the PacBio HiFi sequencing of the single cells included in this study was only one-third of the average data amount generated for the single cells on the Illumina platform, we detected similar numbers of SNVs in PacBio HiFi data and Illumina data. Among these, we found 28 somatic SNVs that distinguish the two *in vitro* expanded T cell clones, including one example of mitochondrial heteroplasmy. This finding demonstrates the utility of our method to detect genetic mosaicism at the single-cell level. Furthermore, the PacBio HiFi data enables the identification of genetic alterations that are difficult to detect in Illumina short-read data, such as kilobase-size insertions and deletions. Of particular interest are tandem repeats, since they have not previously been explored in single cells. On average our method determined the correct size for 4,770 tandem repeat elements per single cell, several of them of length over 100 bp.

Although somatic variation in structural variants and tandem repeats may exist, we found no such evidence in this study. Our results thus indicate that the genetic differences between the

two T-cell clones A and B mainly consist of SNVs and that more complex structural variation occurs at a lower frequency. However, more detailed analyses of larger numbers of single cells from the two T-cell clones would be required to give conclusive answers about the full extent of somatic variability in SVs and repeat elements. Moreover, our study is still limited by the non-chimeric read lengths generated by the dMDA, and even longer reads would be required to investigate many of the larger repeats and complex SVs that may occur in these genomes.

A human cell contains about six picograms of DNA, and this is a major challenge for PacBio HiFi sequencing which typically requires several micrograms of input material. An ultra-low input HiFi protocol is available<sup>59</sup>, but this still requires five nanograms DNA. Thus, substantial amplification of single-cell genomes is required to obtain sufficient amounts of DNA for PacBio HiFi sequencing. Multiple methods for single-cell whole genome amplification exist, but the majority of these are incompatible with long-read sequencing due to the small fragment lengths. MDA represents a promising approach for whole genome amplification and long-read sequencing since this method can produce 10-12 kb long fragments. However, MDA is known for amplification bias which, in turn, limits the complexity of sequencing libraries and only a small fraction of the genome may be recovered. Here, we take advantage of MDA to produce long fragments while reducing the amplification bias by performing MDA reactions in individual droplets.

Allelic dropout is always a challenge for single-cell WGS, and our results could be improved by having a higher proportion of DNA fragments encapsulated and amplified in the droplets. Several factors could lead to allelic dropout, including failed amplification of DNA molecules lost in sample preparation, droplet reagent loading, or DNA fragments that are either too short or too long to be efficiently encapsulated. Another important challenge is that whole genome

amplification introduces chimeras and errors. To some extent, this might be improved by alternative amplification methods or modified experimental conditions. However, further optimizations may not enable the complete removal of amplification errors in the resulting reads. An increased amount of genomic information from single cells may instead be achieved through the development of new bioinformatics tools, specifically designed for single-cell long-read WGS data, which can resolve amplification errors and maximize the utility of the data.

In this project, we opted for PacBio HiFi sequencing since it currently offers the highest per-read accuracy<sup>60</sup>. Although nanopore WGS<sup>61</sup> could be an alternative, it would likely be more challenging to study SNVs and identify chimeric artifacts from nanopore reads because of their higher error rate. However, there is still an open question about which sequencing platform would be best suited for this application in the future. This will depend on factors such as the sequencing yield, quality, and cost per sample, for coming versions of instruments. Due to the rapid developments of long-read technologies, we anticipate that several of these parameters can be radically improved over the coming years.

In conclusion, we demonstrate that long-read genome analysis can be performed not only at a species, population, or individual-level, but also for single cells. Ultimately, new innovations and technical advances may in the future enable near-complete genome assemblies and full haplotype reconstructions from individual cells.

## **Acknowledgements**

We thank Thorarinn Blondal at Samplix for assistance in setting up the Xdrop system for dMDA experiments. Library preparation and sequencing was performed at the SciLifeLab National Genomics Infrastructure in Stockholm and Uppsala. Computational analyses were

performed on resources provided by SNIC through Uppsala Multidisciplinary Center for Advanced Computational Science (UPPMAX) under the SNIC projects sens2016003 and sens2019020. The project was partially funded by the SciLifeLab Uppsala Technology Development Project Grant, the Swedish Research Council (2019-01976) and the Göran Gustafsson Foundation.

## Methods

### *Single-cell samples*

Peripheral blood was collected from a healthy human donor by venipuncture. The donor was previously vaccinated with the live, attenuated Yellow Fever Virus (YFV) vaccine (YFV-17D) as part of an ongoing study to investigate the dynamics of adaptive immunity to YFV vaccination (approved by the Regional Ethical Review Board in Stockholm, Sweden: 2008/1881-31/4, 2013/216-32, and 2104/1890-32). To expand CD8<sup>+</sup> T cell clones from single YFV-specific memory CD8<sup>+</sup> T-cells, mononuclear cells were isolated from peripheral blood by density centrifugation and were first stained with HLA-A2/YFV(LLWNGPMAV)-dextramer FITC (Immudex, Denmark) for 15min at 4°C, followed by staining with anti-CD8a-BV570 (clone RPA-T8, Biolegend), anti-CD3-PE/Cy5 (clone UCHT1), anti-CD14-V500 (clone MφP9), anti-CD19-V500 (clone HIB19) (all from BD Biosciences), and LIVE/DEAD™ Fixable Aqua Dead Cell Stain (ThermoFisher) for 20 min at 4°C. After washing, single live CD14<sup>-</sup>CD19<sup>-</sup>CD8<sup>+</sup>CD3<sup>+</sup>HLA-A2/YFV-dextramer<sup>+</sup> cells were sorted directly into 96 well U-bottom plates containing 500ng/ml HLA-A2/YFV peptide (LLWNGPMAV), 40U/ml human recombinant IL-2, and 40.000 irradiated (25Gy) CD3-depleted autologous PBMCs in T-cell media (RPMI1640 with 10% heat-inactivated human AB sera, 1mM sodium pyruvate, 10mM Hepes, 50µM 2-mercaptoethanol, 1mM L-glutamine, 100U/ml penicillin and 50µg/ml streptomycin) and were cultured for 20 days. Every 7 days half of the media was replaced with fresh T-cell media containing 50U/ml IL-2, 500ng/ml peptide, and 40.000 irradiated CD3-depleted autologous PBMCs, and the wells were visually inspected for proliferation. Clonal expansions of single HLA-A2/YFV-specific CD8<sup>+</sup> T-cells clones were confirmed by flow cytometry by using the same staining protocol as described above. Clones with a sufficient number of clonal progeny were subsequently cryopreserved in fetal bovine serum with 10% DMSO and stored in liquid nitrogen until sorting for DNA/RNA sequencing analysis. To isolate



single cells from two selected YFV-specific CD8<sup>+</sup> T cell clones (A and B), the clones were thawed, washed twice in RPMI1640 supplemented with 10% fetal bovine serum, and stained with the antibodies described above and index-sorted into 96 well PCR plates (Thermo Fisher) or a dMDA cartridge containing lysis buffer as described in the following sections.

### ***Whole-genome amplification by droplet MDA (dMDA)***

The single T-cells were sorted in a FACS instrument equipped with a custom 3D printed adapter holding a dMDA cartridge (cat# CA20100-16, Samplix ApS, Herlev, Denmark) and deposited directly into 2.8  $\mu$ L lysis buffer (200 mM KOH, 5 mM EDTA (pH 8) and 40 mM 1,4-dithiothreitol) positioned at the dMDA cartridge's Inlet site. Single cells were lysed, and DNA denatured for 5 minutes at room temperature followed by the addition of 1.4  $\mu$ L neutralization buffer (400 mM HCl and 600 mM Tris HCl (pH 7.5)) and incubated for 5 min at room temperature. Then, 15.8  $\mu$ L MDA amplification mixture including polymerase, primers, dNTP, and reaction buffer (Samplix dMDA kit item# RE20300, Samplix ApS, Herlev, Denmark), was added, by injecting it into the dMDA cartridge Inlet site using a wide bore pipette. Finally, 75  $\mu$ L dMDA oil (Samplix dMDA kit item# RE20300, Samplix ApS, Herlev, Denmark) was added into the inlet well. The dMDA cartridge was moved into the Xdrop<sup>TM</sup> droplet generator (item# IN00100-SF002 Samplix ApS, Herlev, Denmark) to create single emulsion dMDA droplets. Droplets were collected into low bind 0.2 ml PCR vials from the Collection container of the dMDA cartridge and excess oil was removed from the bottom. The MDA droplets were incubated in a thermal block at 30°C for 16 hours and then heat-inactivated at 65°C for 10 minutes and then cooled down to 4°C. Droplets were broken by adding 20  $\mu$ L Break solution (Samplix dMDA kit item# RE20300, Samplix ApS, Herlev, Denmark) and the aqueous phase collected containing the amplified DNA. DNA material from Xdrop<sup>TM</sup> droplet MDA reactions was quantified using Qubit<sup>TM</sup> Fluorometer (ThermoFisher Inc., Waltham, MA, USA) and the

DNA integrity was investigated using Fragment Analyzer (Agilent Inc., Santa Clara, CA, USA) according to the manufacturer's instructions.

### ***Whole-genome amplification by regular MDA***

For comparison to the Xdrop™ droplet MDA process, single T-cells were sorted in the FACS and singly deposited directly into 2.8 µL lysis buffer (200 mM KOH, 5 mM EDTA (pH 8) and 40 mM 1.4 DTT) at the bottom of a 0.2 ml PCR vial or 96 well plate. Single cells were lysed, and DNA denatured for 5 minutes at room temperature followed by the addition of 1.4 µL neutralization buffer (400 mM HCl and 600 mM Tris HCl (pH 7.5)) and incubation for 5 min at room temperature. The MDA reactions were prepared using RepliPhi Phi29 DNA polymerase and Reagent set (Epicentre, Illumina, Madison, WI, USA) according to the manufacturer's instructions. The reactions were carried out at 30°C for 8-16 hours and then heat-inactivated at 65°C for 10 minutes.

### ***Illumina whole genome sequencing***

Illumina libraries were prepared using an automated version of the TruSeq DNA PCR-Free kit. Briefly, DNA was quantified using Qubit HS DNA and 1µg of DNA was used as input. The samples were then fragmented using Covaris E220 system, aiming for a fragment size of 350bp. Fragmented DNA was end-repaired, followed by size selection using Dynabeads MyOne Carboxylic Acid beads. Illumina TruSeq DNA CD Indexes with sample-specific barcode sequences were ligated and the final product was cleaned up using AMPure XP beads. Finished libraries were normalized based on their concentration and sequenced on NovaSeq6000 (NovaSeq Control Software 1.6.0/RTA v3.4.4) with a 2x151 setup using 'NovaSeqXp' workflow in 'S4' mode flowcell. Bcl to FastQ conversion was performed using bcl2fastq\_v2.20.0.422 from the CASAVA software suite.

### ***Mapping and variant detection in Illumina data***

Illumina data was aligned to GRCh38 using BWA mem (0.7.17-r1188)<sup>62</sup>. The aligned data was sorted using Samtools sort (1.10)<sup>63</sup> and deduplicated using Picard MarkDuplicates (2.20.4-SNAPSHOT) (<https://broadinstitute.github.io/picard/>). Quality control was performed using Picard CollectGCMetrics and Picard WGSMetrics, as well as Samtools flagstats. The analysis was performed on the PCR-free bulk WGS and each of the single-cell samples. The subsequent bam files were searched for SNV and SV. The SNV calling was performed using Bcftools call (1.10+htslib-1.10) and the resulting SNVs were decomposed and normalized using Vt<sup>64</sup>. SV detection was performed using TIDDIT (2.11.0)<sup>55</sup> and Manta (1.6.0)<sup>54</sup>. Briefly, the TIDDIT calls were filtered based on the Filter column – keeping only PASS variants. Next, the SV calls were combined using SVDB merge (2.4.0), combining calls positioned within 200 bp from each other, and sharing an overlap of at least 10% bases.

### ***Downsampling and quality control of Illumina data***

Downsampling to 100M read pairs was performed for each Illumina dataset using Samtools view. Thereafter, the coverage was analyzed using TIDDIT cov, computing the coverage in bins sized 5 kbp and 500 kbp across the entire genome. The 500 kbp analysis was visualized using Circos<sup>65</sup>, displaying coverage levels as a heatmap. The 5 kbp analysis was used to estimate the fraction of reads within high (>200X) coverage regions; the fraction of reads in such regions was computed using Samtools view, searching for reads overlapping high coverage regions as reported by TIDDIT cov.

### ***PacBio whole genome sequencing***

Five dMDA samples, two from clone A and three from clone B, were chosen for sequencing based on input fragment length and DNA amount. The samples were fragmented to 10 kb using Megaruptor 2 (Diagenode). For each fragmented sample, SMRTbell construction was performed using the Express Template prep kit 2.0. Incomplete SMRTbells were removed using the SMRTbell Enzyme Clean up Kit. SMRTbells were size selected using AMPure beads to remove fragments shorter than 3kb. The library preparation procedure is described in the protocol “Preparing HiFi Libraries from Low DNA Input Using SMRTbell Express Template Prep Kit 2.0” from PacBio. The SMRTbell library sizes and profiles were evaluated using the Agilent DNA 12000 kit on the Bioanalyzer system. A separate SMRTbell library was prepared from bulk DNA according to Pacbio’s Procedure & Checklist – Preparing HiFi SMRTbell® Libraries using the SMRTbell Express Template Prep Kit 2.0. Size selection of the bulk DNA HiFi library was performed using the SageElf system. PacBio sequencing was performed on the Sequel II or Sequel Ii instrument with 30h movie time. The single cell libraries were sequenced on one SMRT cell each, while the bulk DNA library was sequenced across three SMRT cells generating 32x coverage of the human genome.

### ***Mapping and variant detection in PacBio data***

PacBio HiFi reads were generated using the circular consensus sequencing (CCS) tool in SMRTLink v10. The HiFi reads were aligned to hg38 using version 2.18 of Minimap<sup>266</sup>. DeepVariant<sup>52</sup> (v 1.0.0) was used for SNVs calling and structural variants were detected with Sniffles<sup>53</sup> (v 1.0.12). Tandem repeats were detected through re-alignment of the raw HiFi data using LAST followed by analysis with Tandem Genotypes<sup>56</sup> (v1.1.0). Each analysis was performed individually for the individual T-cells, as well as on the 32x coverage PacBio bulk dataset.

### ***Detection of somatic SNVs in PacBio single-cell data***

Somatic SNVs were detected by first selecting all SNVs occurring in at least two single cells originating from the same T-clone (either A or B). Next, all SNVs that were called in the bulk sample or from a single-cell from the other clone were removed. To exclude SNVs that may occur due to alignment errors, we further removed all small insertion/deletion variants as well as SNVs occurring in highly repetitive regions. The remaining SNPs were manually inspected in IGV<sup>67</sup> to link each somatic variant to its respective haplotype obtained from the bulk DNA sample.

### ***Analysis of SV events in PacBio single-cell data***

All SVs classed as break-end (BND) by the Sniffles SV calling were removed from the single-cell data since we were uncertain about their quality. After this, a high-confidence SVs dataset was generated for each single cell data by only keeping those as having a reciprocal overlap of at least 95% with an SV from the bulk PacBio sample. The overlap was calculated using the function “bedtools intersect” in BEDTools<sup>68</sup> (v2.29.2). We then searched for somatic SVs among the remaining SVs not detected in the bulk sample. For this analysis, we only kept somatic SV candidates occurring in at least two single cells from the same clone (A or B), but not in any single cell from the other clone. The somatic SV candidates were then manually inspected using IGV<sup>67</sup> but no event was found to clearly distinguish between the two T-cell clones.

### ***Analysis of tandem repeats***

To facilitate the analysis of tandem repeats (TRs), we focused only on the elements that could be clearly genotyped as either homozygous or heterozygous in the PacBio bulk DNA samples. We therefore required that the TRs in the bulk sample should have i) at least 5 reads for each

of the two alleles for a heterozygous sample, and at least 10 reads for a homozygous sample ii) no other alleles detected in more than 2 reads iii) at least 90% of reads corresponding to the repeat allele(s) iv) a total coverage of at most 50x. This analysis resulted in 15,098 TRs, which we focused on for the analysis of the PacBio single cells data. In each of the single cells, we analyzed the TR results at the 15,098 sites. Results were reported for all TRs that could be genotyped either as heterozygous or homozygous in the single cells. We further searched for TRs having different lengths in the single cells as compared to bulk DNA but found no such examples.

### ***Assembly of PacBio single-cell data***

The PacBio HiFi reads were first filtered to remove intramolecular chimeras. This filtering was done by aligning each read to its sequence using BLAST<sup>69</sup> and removing all reads that have a secondary blast hit against themselves, at an identity higher than 90%. In this way, reads containing intramolecular chimeras such as inversions and duplications are efficiently removed. The HiFi reads that pass the chimera filtering were then assembled using hifiasm<sup>57</sup> (v. 0.7-dirty-r255).

## Figures

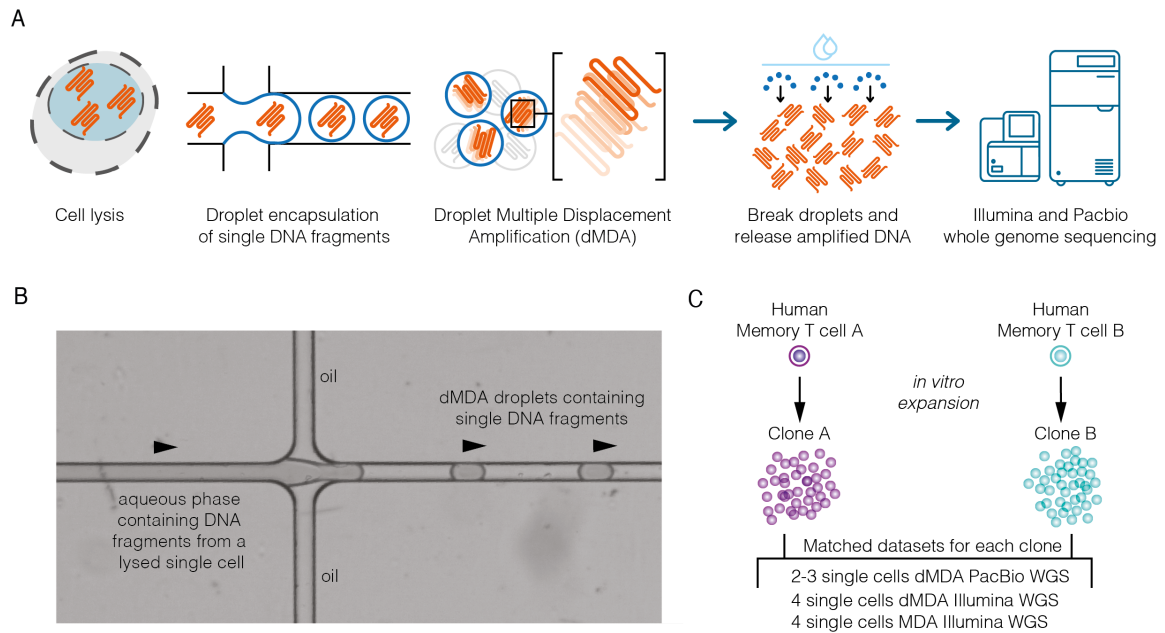

**Figure 1. Overview of the single-cell DNA amplification and sequencing experiment. A)** An individual cell is isolated by fluorescence-activated cell sorting (FACS) and placed into a well containing lysis buffer. DNA molecules from the lysed single cell are then encapsulated in picoliter droplets using the Xdrop microfluidic system, after which dMDA whole genome amplification takes place inside each droplet. After amplification, the droplets are broken and DNA is released, followed by library preparation and whole genome sequencing using short- (Illumina) and long-read (PacBio) technologies. **B)** Image showing how droplets are formed in the Xdrop microfluidic system. An aqueous phase containing lysed DNA and dMDA reagents encounters an oil layer, resulting in <math><100\ \mu\text{m}</math> diameter droplets where single DNA fragments are captured. The Xdrop system has the capacity to produce around 50,000 droplets in 45 seconds. **C)** Two human memory T-cells (cells A and B) from the same individual were used as starting point for the experiments. Collections of daughter cells were obtained by *in vitro* expansion, and individual cells from clones A and B were analyzed using Illumina and PacBio whole genome sequencing.



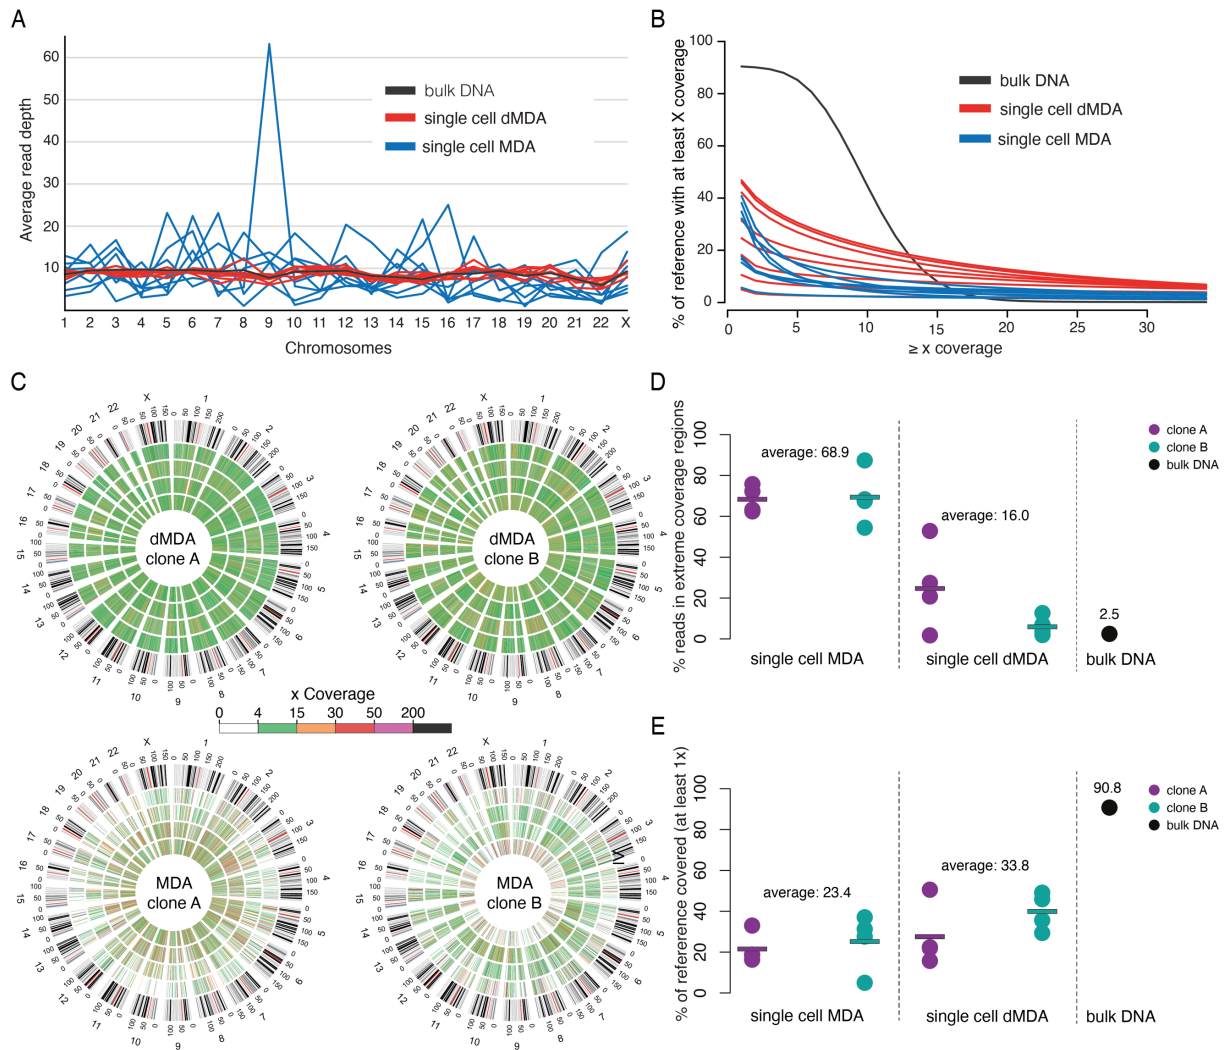

**Figure 2. Comparison of MDA and dMDA for whole genome amplification.** These results are based on Illumina MDA, dMDA, and bulk sequencing where the datasets have been randomly downsampled to contain the same number of reads. **A)** The figure displays the average sequencing depth across the human chromosomes. The dMDA single-cell samples display good uniformity of coverage, whereas the MDA data show high spikes due to amplification bias. **B)** Plot showing the percentage of bases in the reference genome (y-axis) having a minimal coverage (x-axis). On average the dMDA samples have more bases covered at a range 10x-30x, as compared to the single-cell samples subjected to regular MDA. **C)** Circle plots showing sequencing coverage in 500kb bins for all of the Illumina single-cell samples, color-coded from 0x coverage (white) to over 200x coverage (black). Four replicate samples are included in each of the circle plots, and the chromosomal coordinates are displayed in the outermost circle. The dMDA samples at the top row display more even coverage than the MDA samples below, with more of the bins having average coverage in 4x-15x coverage range (green). **D)** Dot plot showing the percentage of reads aligning to regions of extreme ( $\geq 200x$ ) coverage. Each dot corresponds to an individual sample. The rectangles indicate the average values for each sample type. **E)** Dot plot showing the percentage of reference bases that are covered by at least one read.



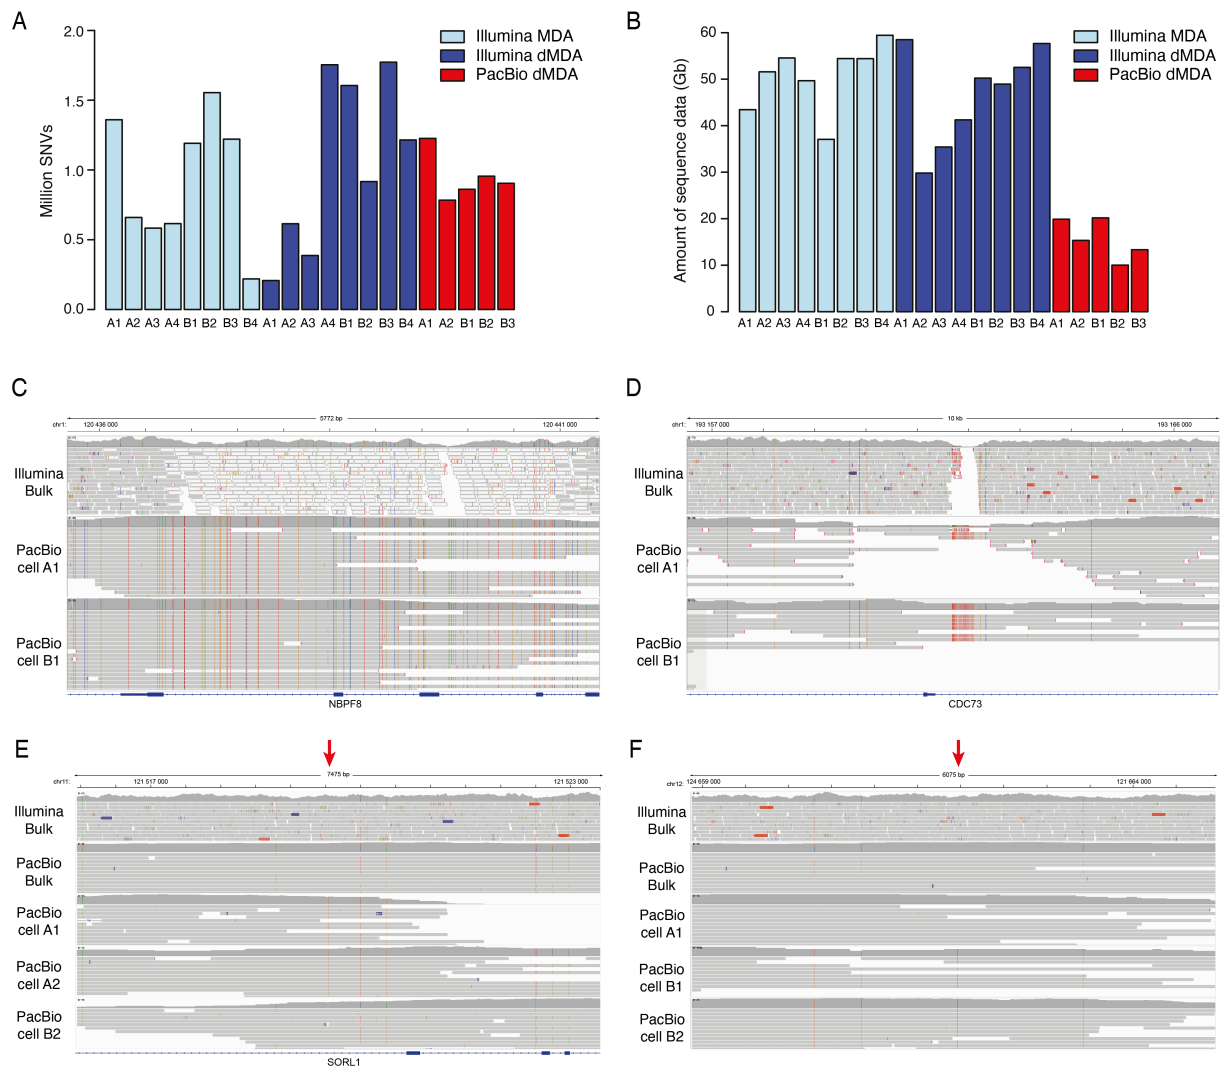

**Figure 3. SNVs detected in single-cell long-read data.** **A)** Number of SNVs in the single T-cells that were identified also in the bulk DNA. An average of 992,338 such “true” SNVs were found in the sixteen Illumina samples, whereas the average in the five PacBio samples was 946,405. **B)** Total amount of data generated for the single cell samples. On average, 48.7 Gb was generated for the sixteen Illumina samples, and 15.7 Gb for the five PacBio samples. **C)** Example of a “dark” genic region (*NBPF8*) where Illumina data fails to align uniquely, while SNVs can be identified and phased in the PacBio single-cell data. **D)** Another example of a “dark” genic region (*CDC73*), where PacBio reads from the two single cells span across a repetitive region that lacks coverage in the Illumina bulk sequencing data. **E)** A somatic SNV in an intron of *SORL1*. The position of the somatic SNV is indicated by the red arrow at the top. The PacBio A1 and A2 single cell samples contain a C>G variant at this position that is linked to several nearby SNPs in the region. In the bulk and PacBio B2 samples, the G is absent from the haplotype. This indicates that the C>G is a somatic variant only present in the T-cells from clone A. **F)** A somatic SNV in an intergenic region on chromosome 12. This G>C variant is only present in T-cells from clone B.

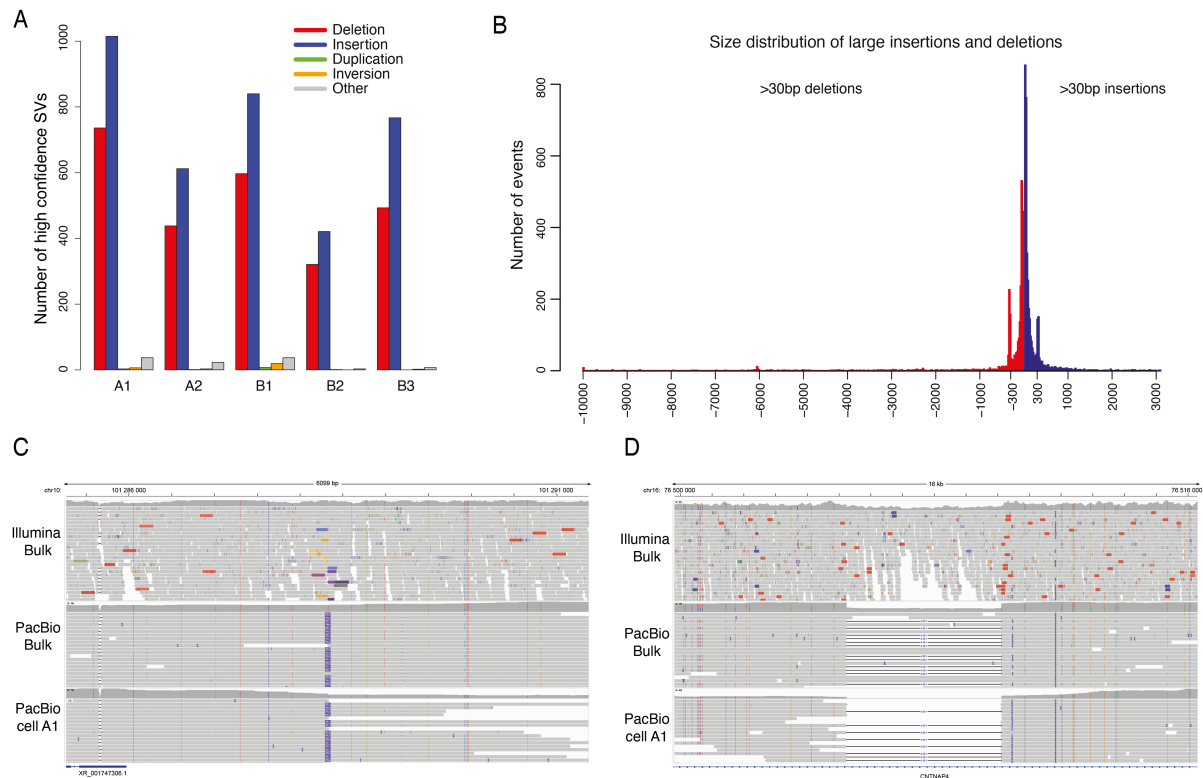

**Figure 4. SVs detected in single-cell long-read data. A)** Overview of high-confidence SVs in PacBio single-cell samples. Each bar corresponds to a set of SVs that were also detected in the PacBio bulk DNA sample. **B)** Length distribution of all high-confidence insertions and deletions of size >30 bp, detected across all five PacBio single-cell samples. **C)** An IGV plot centered around a 711 bp on chromosome 10. The insertion element is detected in the PacBio single-cell A1 (bottom) and can be phased to one of the haplotypes in PacBio bulk DNA data (middle). The insertion is not clearly visible in the Illumina bulk DNA data (at the top) and it would not be possible to resolve the haplotypes from short-read sequencing alone. **D)** A 4,891 bp deletion in an intron of *CNTNAP4* identified both in PacBio single-cell and bulk data. The Illumina data shows a drop of coverage indicative of a heterozygous deletion, but the exact break points and haplotypes are not clearly visible.

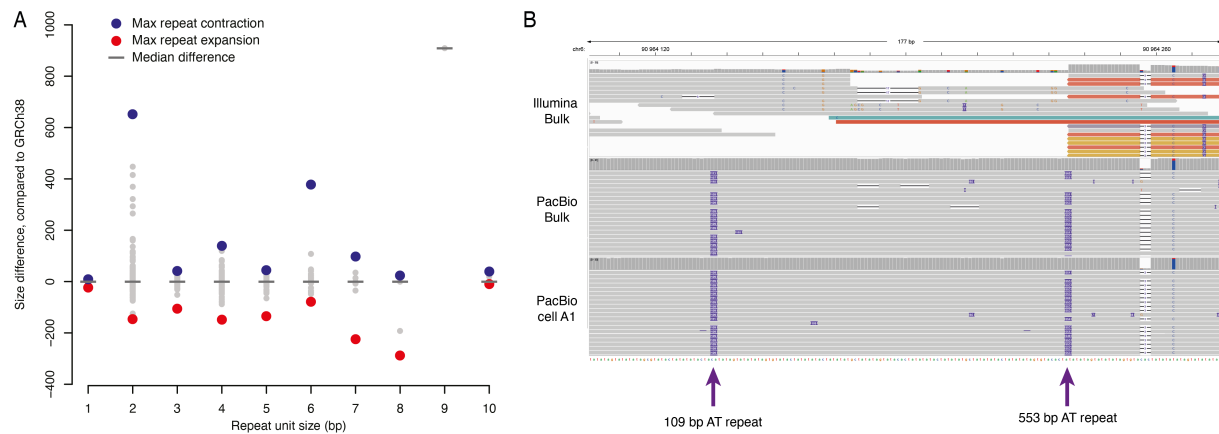

**Figure 5. Tandem repeats detected in single-cell long-read data. A)** Overview of high-confidence tandem repeats detected across the five single-cell samples. All of these repeats were identified with the same repeat size in the PacBio bulk DNA sample. On the x-axis is the repeat unit size and on the y-axis is the length difference of the repeat, when compared to the human GRCh38 reference. A negative value on the y-axis corresponds to a contraction of the repeat and a positive value corresponds to a repeat expansion. The extreme values are marked in red and blue. The median difference is zero for most of the repeat units, meaning that most of the repeats have the same size as in GRCh38. **B)** The IGV plot shows a region on chromosome 6 where the single-cell data an AT-repeat of 662 bp was detected in the PacBio single-cell and bulk data. In the alignment, the 662 bases are divided into two separate repeat insertions with 109 bp and 553 bp, respectively. The region is difficult to analyze in by Illumina sequencing.

## References

1. Lewin, H.A. et al. Earth BioGenome Project: Sequencing life for the future of life. *Proc Natl Acad Sci U S A* **115**, 4325-4333 (2018).
2. Rhie, A. et al. Towards complete and error-free genome assemblies of all vertebrate species. *Nature* **592**, 737-746 (2021).
3. Nurk, S. et al. The complete sequence of a human genome. *Science* **376**, 44-53 (2022).
4. Audano, P.A. et al. Characterizing the Major Structural Variant Alleles of the Human Genome. *Cell* **176**, 663-675 e619 (2019).
5. Chaisson, M.J.P. et al. Multi-platform discovery of haplotype-resolved structural variation in human genomes. *Nat Commun* **10**, 1784 (2019).
6. Ebert, P. et al. Haplotype-resolved diverse human genomes and integrated analysis of structural variation. *Science* (2021).
7. Mantere, T., Kersten, S. & Hoischen, A. Long-Read Sequencing Emerging in Medical Genetics. *Front Genet* **10**, 426 (2019).
8. Ameer, A., Kloosterman, W.P. & Hestand, M.S. Single-Molecule Sequencing: Towards Clinical Applications. *Trends Biotechnol* **37**, 72-85 (2019).
9. Noyes, M.D. et al. Familial long-read sequencing increases yield of de novo mutations. *Am J Hum Genet* **109**, 631-646 (2022).
10. Ebbert, M.T.W. et al. Systematic analysis of dark and camouflaged genes reveals disease-relevant genes hiding in plain sight. *Genome Biol* **20**, 97 (2019).
11. Navin, N. et al. Tumour evolution inferred by single-cell sequencing. *Nature* **472**, 90-94 (2011).
12. Evrony, G.D. et al. Single-neuron sequencing analysis of L1 retrotransposition and somatic mutation in the human brain. *Cell* **151**, 483-496 (2012).
13. Lu, S. et al. Probing meiotic recombination and aneuploidy of single sperm cells by whole-genome sequencing. *Science* **338**, 1627-1630 (2012).
14. Wang, J., Fan, H.C., Behr, B. & Quake, S.R. Genome-wide single-cell analysis of recombination activity and de novo mutation rates in human sperm. *Cell* **150**, 402-412 (2012).
15. Zong, C., Lu, S., Chapman, A.R. & Xie, X.S. Genome-wide detection of single-nucleotide and copy-number variations of a single human cell. *Science* **338**, 1622-1626 (2012).
16. Brazhnik, K. et al. Single-cell analysis reveals different age-related somatic mutation profiles between stem and differentiated cells in human liver. *Sci Adv* **6**, eaax2659 (2020).
17. Kirkness, E.F. et al. Sequencing of isolated sperm cells for direct haplotyping of a human genome. *Genome Res* **23**, 826-832 (2013).
18. Evrony, G.D. et al. Cell lineage analysis in human brain using endogenous retroelements. *Neuron* **85**, 49-59 (2015).
19. Lodato, M.A. et al. Aging and neurodegeneration are associated with increased mutations in single human neurons. *Science* **359**, 555-559 (2018).
20. Lodato, M.A. et al. Somatic mutation in single human neurons tracks developmental and transcriptional history. *Science* **350**, 94-98 (2015).
21. Dong, X. et al. Accurate identification of single-nucleotide variants in whole-genome-amplified single cells. *Nat Methods* **14**, 491-493 (2017).
22. Lan, F., Demaree, B., Ahmed, N. & Abate, A.R. Single-cell genome sequencing at ultra-high-throughput with microfluidic droplet barcoding. *Nat Biotechnol* **35**, 640-646 (2017).
23. Vitak, S.A. et al. Sequencing thousands of single-cell genomes with combinatorial indexing. *Nat Methods* **14**, 302-308 (2017).

24. Zahn, H. et al. Scalable whole-genome single-cell library preparation without preamplification. *Nat Methods* **14**, 167-173 (2017).
25. Zhang, L. et al. Single-cell whole-genome sequencing reveals the functional landscape of somatic mutations in B lymphocytes across the human lifespan. *Proc Natl Acad Sci U S A* **116**, 9014-9019 (2019).
26. Bohrson, C.L. et al. Linked-read analysis identifies mutations in single-cell DNA-sequencing data. *Nat Genet* **51**, 749-754 (2019).
27. Hard, J. et al. Conbase: a software for unsupervised discovery of clonal somatic mutations in single cells through read phasing. *Genome Biol* **20**, 68 (2019).
28. Hazen, J.L. et al. The Complete Genome Sequences, Unique Mutational Spectra, and Developmental Potency of Adult Neurons Revealed by Cloning. *Neuron* **89**, 1223-1236 (2016).
29. Lee-Six, H. et al. Population dynamics of normal human blood inferred from somatic mutations. *Nature* **561**, 473-478 (2018).
30. McConnell, M.J. et al. Mosaic copy number variation in human neurons. *Science* **342**, 632-637 (2013).
31. Satas, G. & Raphael, B.J. Haplotype phasing in single-cell DNA-sequencing data. *Bioinformatics* **34**, i211-i217 (2018).
32. Jeong, H. et al. Functional analysis of structural variants in single cells using Strand-seq. *Nat Biotechnol* (2022).
33. Cai, X. et al. Single-cell, genome-wide sequencing identifies clonal somatic copy-number variation in the human brain. *Cell Rep* **8**, 1280-1289 (2014).
34. Baslan, T. et al. Optimizing sparse sequencing of single cells for highly multiplex copy number profiling. *Genome Res* **25**, 714-724 (2015).
35. Knouse, K.A., Wu, J. & Amon, A. Assessment of megabase-scale somatic copy number variation using single-cell sequencing. *Genome Res* **26**, 376-384 (2016).
36. Upton, K.R. et al. Ubiquitous L1 mosaicism in hippocampal neurons. *Cell* **161**, 228-239 (2015).
37. Evrony, G.D., Lee, E., Park, P.J. & Walsh, C.A. Resolving rates of mutation in the brain using single-neuron genomics. *Elife* **5** (2016).
38. Fan, X. et al. SMOOTH-seq: single-cell genome sequencing of human cells on a third-generation sequencing platform. *Genome Biol* **22**, 195 (2021).
39. Gawad, C., Koh, W. & Quake, S.R. Single-cell genome sequencing: current state of the science. *Nat Rev Genet* **17**, 175-188 (2016).
40. Chen, C. et al. Single-cell whole-genome analyses by Linear Amplification via Transposon Insertion (LIANTI). *Science* **356**, 189-194 (2017).
41. Dean, F.B. et al. Comprehensive human genome amplification using multiple displacement amplification. *Proc Natl Acad Sci U S A* **99**, 5261-5266 (2002).
42. Fu, Y. et al. Uniform and accurate single-cell sequencing based on emulsion whole-genome amplification. *Proc Natl Acad Sci U S A* **112**, 11923-11928 (2015).
43. Leung, K. et al. Robust high-performance nanoliter-volume single-cell multiple displacement amplification on planar substrates. *Proc Natl Acad Sci U S A* **113**, 8484-8489 (2016).
44. Marcy, Y. et al. Nanoliter reactors improve multiple displacement amplification of genomes from single cells. *PLoS Genet* **3**, 1702-1708 (2007).
45. Wenger, A.M. et al. Accurate circular consensus long-read sequencing improves variant detection and assembly of a human genome. *Nat Biotechnol* **37**, 1155-1162 (2019).

46. Vollger, M.R. et al. Improved assembly and variant detection of a haploid human genome using single-molecule, high-fidelity long reads. *Ann Hum Genet* **84**, 125-140 (2020).
47. Porubsky, D. et al. Fully phased human genome assembly without parental data using single-cell strand sequencing and long reads. *Nat Biotechnol* (2020).
48. Miga, K.H. et al. Telomere-to-telomere assembly of a complete human X chromosome. *Nature* (2020).
49. Garg, S. et al. Chromosome-scale, haplotype-resolved assembly of human genomes. *Nat Biotechnol* (2020).
50. Madsen, E.B., Hoijer, I., Kvist, T., Ameer, A. & Mikkelsen, M.J. Xdrop: Targeted sequencing of long DNA molecules from low input samples using droplet sorting. *Hum Mutat* **41**, 1671-1679 (2020).
51. Ludwig, L.S. et al. Lineage Tracing in Humans Enabled by Mitochondrial Mutations and Single-Cell Genomics. *Cell* **176**, 1325-1339 e1322 (2019).
52. Poplin, R. et al. A universal SNP and small-indel variant caller using deep neural networks. *Nat Biotechnol* **36**, 983-987 (2018).
53. Sedlazeck, F.J. et al. Accurate detection of complex structural variations using single-molecule sequencing. *Nat Methods* **15**, 461-468 (2018).
54. Chen, X. et al. Manta: rapid detection of structural variants and indels for germline and cancer sequencing applications. *Bioinformatics* **32**, 1220-1222 (2016).
55. Eisfeldt, J., Vezzi, F., Olason, P., Nilsson, D. & Lindstrand, A. TIDDIT, an efficient and comprehensive structural variant caller for massive parallel sequencing data. *F1000Res* **6**, 664 (2017).
56. Mitsuhashi, S. et al. Tandem-genotypes: robust detection of tandem repeat expansions from long DNA reads. *Genome Biol* **20**, 58 (2019).
57. Cheng, H., Concepcion, G.T., Feng, X., Zhang, H. & Li, H. Haplotype-resolved de novo assembly using phased assembly graphs with hifiasm. *Nat Methods* **18**, 170-175 (2021).
58. Simao, F.A., Waterhouse, R.M., Ioannidis, P., Kriventseva, E.V. & Zdobnov, E.M. BUSCO: assessing genome assembly and annotation completeness with single-copy orthologs. *Bioinformatics* **31**, 3210-3212 (2015).
59. <https://www.pacb.com/blog/introducing-the-ultra-low-input-protocol-for-smrt-sequencing/>. (2020).
60. Logsdon, G.A., Vollger, M.R. & Eichler, E.E. Long-read human genome sequencing and its applications. *Nat Rev Genet* **21**, 597-614 (2020).
61. Jain, M. et al. Nanopore sequencing and assembly of a human genome with ultra-long reads. *Nat Biotechnol* **36**, 338-345 (2018).
62. Li, H. Aligning sequence reads, clone sequences and assembly contigs with BWA-MEM. arXiv:1303.3997 (2013).
63. Li, H. et al. The Sequence Alignment/Map format and SAMtools. *Bioinformatics* **25**, 2078-2079 (2009).
64. Tan, A., Abecasis, G.R. & Kang, H.M. Unified representation of genetic variants. *Bioinformatics* **31**, 2202-2204 (2015).
65. Krzywinski, M. et al. Circos: an information aesthetic for comparative genomics. *Genome Res* **19**, 1639-1645 (2009).
66. Li, H. Minimap2: pairwise alignment for nucleotide sequences. *Bioinformatics* **34**, 3094-3100 (2018).

67. Thorvaldsdottir, H., Robinson, J.T. & Mesirov, J.P. Integrative Genomics Viewer (IGV): high-performance genomics data visualization and exploration. *Brief Bioinform* **14**, 178-192 (2013).
68. Quinlan, A.R. & Hall, I.M. BEDTools: a flexible suite of utilities for comparing genomic features. *Bioinformatics* **26**, 841-842 (2010).
69. Altschul, S.F., Gish, W., Miller, W., Myers, E.W. & Lipman, D.J. Basic local alignment search tool. *J Mol Biol* **215**, 403-410 (1990).
